# Supplementary material for: Educational Approach to Prevent the Burden of Vaccinia Virus Infections in a Bovine Vaccinia Endemic Area in Brazil
Source: MDPI journal article supplement (doi:10.3390/pathogens10050511), 2021-04-23
Supplement: s1 [file s1]

**DEZ DICAS  
PARA  
PREVENIR E  
RECONHECER  
A VACCÍNIA  
BOVINA NO  
SEU REBANHO**

**10**

---

Reconhecer para  
controlar!

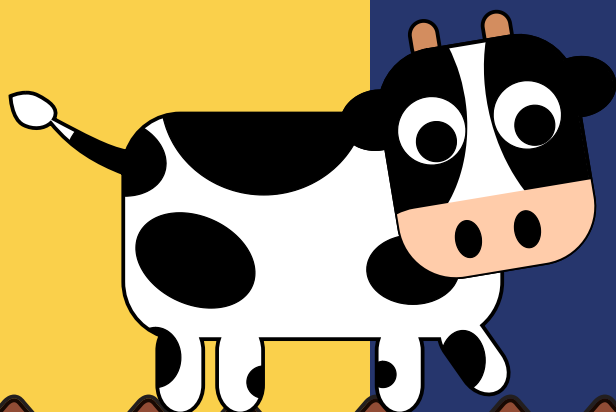

# A VACCINIA BOVINA, TAMBÉM CONHECIDA COMO VARÍOLA BOVINA É UMA DOENÇA VIRAL QUE AFETA PRINCIPALMENTE O GADO LEITEIRO, PROVOCANDO QUEDA NA PRODUÇÃO DE LEITE E DOENÇA NOS ORDENHADORES.

As vacas doentes transmitem o vírus para os ordenhadores que encostam nas feridas durante a ordenha e para os bezerros que mamam nas tetas doentes. Os ordenhadores, por sua vez, podem transmitir a doença para outros humanos e outros animais.

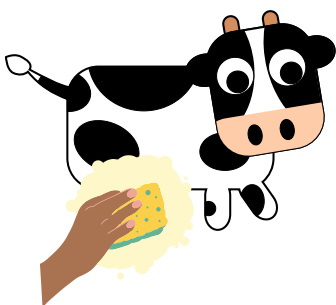

## 01

LAVE AS TETAS DO ANIMAL COM ÁGUA E SABÃO, RETIRANDO TODO O RESTO DE BARRO E ESTERCO QUE NORMALMENTE SE ACUMULAM NESTE LOCAL. EVITE MOLHAR A PARTE SUPERIOR DO ÚBER (PARTE ONDE O LEITE FICA ARMAZENADO) PARA QUE A SUJEIRA DO LOCAL NÃO ESCORRE PARA AS TETAS.

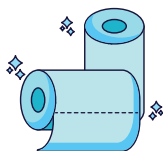

SEQUE COM PAPEL DESCARTÁVEL

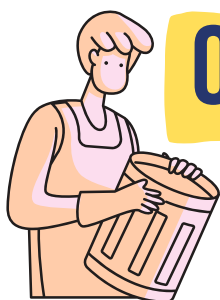

## 02

AINDA ANTES DA ORDENHA, MERGULHE CADA UMA DAS TETAS EM UMA SOLUÇÃO DE IODO OU CLORO. ESTE PROCESSO CHAMADO DE PRÉ DIPPING SERVE PARA COMPLETAR A LIMPEZA, MATANDO AS BACTÉRIAS, FUNGOS OU VÍRUS CAUSADORES DA MASTITE. O PRODUTO PODE SER APLICADO COM O AUXÍLIO DE UM COPO E A SOBRA NÃO DEVE SER REAPROVEITADA EM OUTRO ANIMAL. COPOS ESPECÍFICOS PARA A APLICAÇÃO DE PRÉ E PÓS DIPPING PODEM SER COMPRADOS. NESTE CASO, OPTE PELA COMPRA DE COPOS "SEM RETORNO", ASSIM HAVERÁ GARANTIA DE QUE A SOLUÇÃO UTILIZADA EM UMA VACA NÃO SERÁ RE-UTILIZADA NA PRÓXIMA.

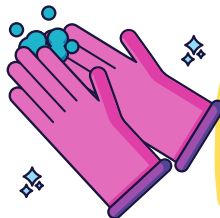

## 03

ANTES DA ORDENHA, LAVE AS SUAS MÃOS COM ÁGUA E SABÃO. NO CASO DE ORDENHA MECÂNICA, FAÇA A LIMPEZA DO EQUIPAMENTO CONFORME MANUAL DO FABRICANTE E SÓ DEPOIS INICIE A ORDENHA.

CUIDE BEM DA SUA ORDENHADEIRA, ALÉM DA LIMPEZA DIÁRIA (ANTES E DEPOIS DA ORDENHA), TROQUE AS BORRACHAS DA TETEIRA SEMPRE QUE NECESSÁRIO PARA QUE NÃO HAJAM RACHADURAS (PODEM ABRIGAR MICRORGANISMOS). OBSERVE SE A PRESSÃO DO VÁCUO ESTÁ ADEQUADA E CONSTANTE. PRESSÕES DE VÁCUO MAIORES, MENORES OU INCONSTANTES PODEM MACHUCAR O ANIMAL FACILITANDO A INFECÇÃO POR MICRORGANISMOS CAUSADORES DA MASTITE E/OU DA VACCINIA BOVINA.

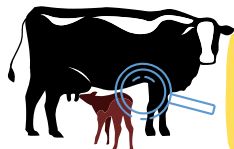

04

OBSERVE AS TETAS DA VACA E O FOCINHO E BOCA DO BEZERRO QUE A ACOMPANHA (SISTEMAS COM "BEZERRO AO PÉ". SE HOUVER BOLHAS OU FERIDAS (PEQUENAS OU GRANDES), NÃO TOQUE-AS SEM LUVAS, DEIXE ESTE ANIMAL PARA SER ORDENHADO DEPOIS DOS OUTROS E PROCEDA COMO DESCRITO NO TÓPICO 10.

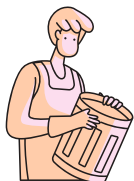

05

APÓS A ORDENHA, DESINFETE NOVAMENTE AS TETAS MERGULHANDO-AS NAS SOLUÇÕES DE CLORO OU IODO. A SOLUÇÃO MAIS ADEQUADA PARA ESSE PROCESSO CHAMADO "PÓS DIPPING" É A DE IODO GLICERINADO. NO ENTANTO, O CLORO OU O IODO SIMPLES TAMBÉM PODEM SER UTILIZADOS COM SUCESSO, DESDE QUE NAS CONCENTRAÇÕES ADEQUADAS.

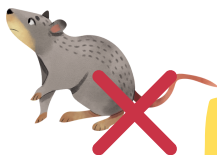

06

AO FINAL DO DIA, O ESTERCO DEVE SER RASPADO E O CURRAL LAVADO COM CLORO (ÁGUA SANITÁRIA). MANTENHA O LOCAL DA ORDENHA E O ARMAZÉM DA RAÇÃO LIMPOS E LIVRES DE ROEDORES. A REMOÇÃO DIÁRIA DAS SOBRAS DE ALIMENTOS NOS COCHOS TAMBÉM É RECOMENDADA.

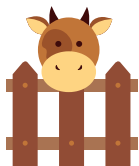

07

SEMPRE QUE ADQUIRIR UM NOVO ANIMAL (BOVINO OU EQUINO) FAÇA A QUARENTENA. MANTENHA-O PRESO E AFASTADO DO SEU REBANHO. OBSERVE SE O ANIMAL APRESENTA FERIDAS OU BOLHAS. NO CASO DE BOVINOS PROCURE NAS TETAS, NO CASO DE BEZERRO OU CAVALOS, EXAMINE A BOCA E FOCINHO.

**CASO O ANIMAL APRESENTE SINAIS DA DOENÇA, MANTENHA-O AFASTADO DOS DEMAIS E PROCEDA COMO DESCRITO NO ITEM 10.**

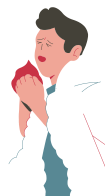

08

OBSERVE SEMPRE SUAS MÃOS E BRAÇOS. CASO ENCONTRE BOLHAS E/OU FERIDAS, DEVE-SE COBRÍ-LAS COM GAZE PARA EVITAR A TRANSMISSÃO DO VÍRUS PARA OUTRAS PESSOAS, ANIMAIS E DISSEMINAÇÃO NO MEIO AMBIENTE. EM CASO DE FEBRE, ÍNGUA NAS AXILAS E MAL ESTAR, PROCURE UM MÉDICO. INFORME-O SOBRE A EXISTÊNCIA DE ANIMAIS DOENTES E ALERTE SOBRE A POSSIBILIDADE DE SER VACCÍNIA BOVINA.

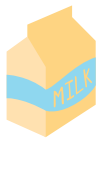

09

EMBORA A TRANSMISSÃO DO VÍRUS PELO LEITE AINDA ESTEJA EM ESTUDO, RECOMENDA-SE QUE O LEITE DAS VACAS DOENTES SEJA FERVIDO ANTES DO CONSUMO.

10

QUANDO EXISTIREM ANIMAIS DOENTES CONSULTE O VETERINÁRIO SOBRE O TRATAMENTO ADEQUADO. AVISE ÀS AUTORIDADES SANITÁRIAS PARA QUE A DOENÇA NÃO SE ESPALHE NO SEU REBANHO OU NA REGIÃO.

**Fotos características das lesões para ajudar a identificar a doença**

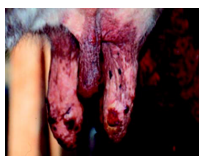

Vaca

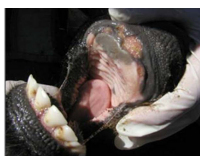

Bezerro

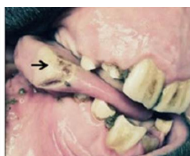

Cavalo

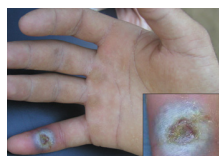

Humano
