# Supplementary material for: Educational Approach to Prevent the Burden of Vaccinia Virus Infections in a Bovine Vaccinia Endemic Area in Brazil
Source: MDPI journal article supplement (doi:10.3390/pathogens10050511), 2021-04-23
Supplement: s1 [file s1]

Archive with 6 entries (6 files):
- Corrected Suppl Figure S1 English.pdf
- Corrected Suppl Figure S2 English.pdf
- Corrected Suppl Figure S3 Spanish.pdf
- Corrected Suppl Figure S4 Spanish.pdf
- Corrected Suppl Figure S5 Portugu¿║s.pdf
- Corrected Suppl Figure S6 Portugu¿║s.pdf
